# Supplementary material for: Perception and Experience of Transcultural Care of Stakeholders and Health Service Users with a Migrant Background: A Qualitative Study
Source: MDPI journal article supplement (doi:10.3390/ijerph181910503), 2021-10-07
Supplement: s1 [file s1]

**Supplementary Table S1. COREQ guidelines**

| <b>Nº</b>                                      | <b>Item</b>                              | <b>Guide questions/description</b>                                    | <b>Page number</b> |
|------------------------------------------------|------------------------------------------|-----------------------------------------------------------------------|--------------------|
| <b>Domain 1: Research team and reflexivity</b> |                                          |                                                                       |                    |
| <i>Personal Characteristics</i>                |                                          |                                                                       |                    |
| 1.                                             | Interviewer                              | Which author/s conducted the interview or focus group?                | Title page         |
| 2.                                             | Credentials                              | What were the researcher's credentials?                               | Title page         |
| 3.                                             | Occupation                               | What was their occupation at the time of the study?                   | Title page         |
| 4.                                             | Gender                                   | Was the researcher male or female?                                    | Title page         |
| 5.                                             | Experience and training                  | What experience or training did the researcher have?                  | Title page         |
| <i>Relationship with participants</i>          |                                          |                                                                       |                    |
| 6.                                             | Relationship established                 | Was a relationship established prior to study commencement?           | p.4                |
| 7.                                             | Participant knowledge of the interviewer | What did the participants know about the researcher?                  | pp.4, 5            |
| 8.                                             | Interviewer characteristics              | What characteristics were reported about the interviewer/facilitator? | p.5                |
| <b>Domain 2: study design</b>                  |                                          |                                                                       |                    |
| <i>Theoretical framework</i>                   |                                          |                                                                       |                    |
| 9.                                             | Methodological orientation and theory    | What methodological orientation was stated to underpin the study?     | p.3                |
| <i>Participant selection</i>                   |                                          |                                                                       |                    |
| 10.                                            | Sampling                                 | How were participants selected?                                       | p.4                |
| 11.                                            | Method of approach                       | How were participants approached?                                     | p.4                |
| 12.                                            | Sample size                              | How many participants were in the study?                              | p.4                |
| 13.                                            | Non-participation                        | How many people refused to participate or dropped out? Reasons?       | N/A                |

### *Setting*

|     |                              |                                                                   |            |
|-----|------------------------------|-------------------------------------------------------------------|------------|
| 14. | Setting of data collection   | Where was the data collected?                                     | p.5        |
| 15. | Presence of non-participants | Was anyone else present besides the participants and researchers? | p.5        |
| 16. | Description of sample        | What are the important characteristics of the sample?             | pp.5, 9-10 |

### *Data collection*

|     |                        |                                                                               |        |
|-----|------------------------|-------------------------------------------------------------------------------|--------|
| 17. | Interview guide        | Were questions, prompts, guides provided by the authors? Was it pilot tested? | pp.6-7 |
| 18. | Repeat interviews      | Were repeat interviews carried out? If yes, how many?                         | N/A    |
| 19. | Audio/visual recording | Did the research use audio or visual recording to collect the data?           | p.5    |
| 20. | Field notes            | Were field notes made during and/or after the interview or focus group?       | N/A    |
| 21. | Duration               | What was the duration of the interviews or focus group?                       | p.5    |
| 22. | Data saturation        | Was data saturation discussed?                                                | N/A    |
| 23. | Transcripts returned   | Were transcripts returned to participants for comment and/or correction?      | N/A    |

### **Domain 3: analysis and findings**

#### *Data analysis*

|     |                                |                                                             |     |
|-----|--------------------------------|-------------------------------------------------------------|-----|
| 24. | Number of data coders          | How many data coders coded the data?                        | p.7 |
| 25. | Description of the coding tree | Did authors provide a description of the coding tree?       | p.8 |
| 26. | Derivation of themes           | Were themes identified in advance or derived from the data? | P.7 |
| 27. | Software                       | What software, if applicable, was used to manage the data?  | N/A |

|                  |                              |                                                                                                           |         |
|------------------|------------------------------|-----------------------------------------------------------------------------------------------------------|---------|
| 28.              | Participant checking         | Did participants provide feedback on the findings?                                                        | N/A     |
| <i>Reporting</i> |                              |                                                                                                           |         |
| 29.              | Quotations presented         | Were participant quotations presented to illustrate the themes / findings? Was each quotation identified? | Results |
| 30.              | Data and findings consistent | Was there consistency between the data presented and the findings?                                        | Results |
| 31.              | Clarity of major themes      | Were major themes clearly presented in the findings?                                                      | Results |
| 32.              | Clarity of minor themes      | Is there a description of diverse cases or discussion of minor themes?                                    | Results |
